# Supplementary material
Source: Springer Nature journal article supplement (https://www.springermedizin.de/resource/supplementary/12931_2013_1469_MOESM2_ESM.pdf/9426254)
Supplement: MOESM2 [file 9426254]

Supplementary table 2. List of Taqman primer and probes used in this study.

| Lab No | Gene name  | Cat No        | gene symbol | Label              | Entrez Gene ID |
|--------|------------|---------------|-------------|--------------------|----------------|
| 1      | IPO8       | Hs00183533    | IPO8        | VIC_Primer Limited | 10526          |
| 2      | E-Cadherin | HS01023894    | CDH1        | FAM                | 999            |
| 4      | cyclin D1  | Hs00765553_m1 | CCND1       | FAM                | 595            |
| 8      | ZEB1       | Hs00232783_m1 | ZEB1        | FAM                | 6935           |
| 9      | ZEB2       | Hs00207691_m1 | ZEB2        | FAM                | 9839           |
| 10     | SNAI1      | Hs00195591_m1 | SNAI1       | FAM                | 6515           |
| 11     | SNAI2      | Hs00950344_m1 | SNAI2       | FAM                | 6591           |
| 12     | E12/E47    | Hs00413032_m1 | TCF3        | FAM                | 6929           |
| 13     | Twist1     | Hs01675818_s1 | TWIST1      | FAM                | 7291           |
